# Supplementary material for: Combined Application of Tacrolimus with Cyproconazole, Hymexazol and Novel {2-(3-R-1H-1,2,4-triazol-5-yl)phenyl}amines as Antifungals: In Vitro Growth Inhibition and In Silico Molecular Docking Analysis to Fungal Chitin Deacetylase
Source: MDPI journal article supplement (doi:10.3390/jof9010079), 2023-01-05
Supplement: s1 [file s1]

Combined application of tacrolimus with cyproconazole, hymexazol and novel {2-(3-R-1*H*-1,2,4-triazol-5-yl)phenyl}amines as antifungals: *In vitro* growth inhibition and *in silico* molecular docking analysis to fungal chitin deacetylase

Lyudmyla Antypenko <sup>1</sup>, Fatuma Meyer <sup>1</sup>, Zhanar Sadyk <sup>1,2</sup>, Konstyantyn Shabelnyk <sup>3</sup>, Sergiy Kovalenko <sup>3</sup>, Karl Gustav Steffens <sup>1</sup> and Leif-Alexander Garbe <sup>1,4,\*</sup>

<sup>1</sup> Faculty of Agriculture and Food Science, Neubrandenburg University of Applied, Brodaer Str. 2, 17033 Neubrandenburg, Germany  
<sup>2</sup> Faculty of Applied Natural Sciences, TH Köln-University of Applied Sciences, Campusplatz 1, 51379 Leverkusen, Germany  
<sup>3</sup> Pharmaceutical Chemistry, Organic and Bioorganic Chemistry Department, Zaporizhzhia State Medical University, Mayakovs’ky Ave. 26, 69035 Zaporizhzhia, Ukraine  
<sup>4</sup> ZELT–Center for Nutrition and Food Technology, Seestrasse 7A, 17033 Neubrandenburg, Germany  
\*Correspondence: garbe@hs-nb.de; Tel.: +49-395-5693-1004

*Abbreviations:* tacrolimus (**1**); hymexazol (**2**); cyproconazole (**3**); 4-chloro-2-(3-cyclobutyl-1*H*-1,2,4-triazol-5-yl)aniline (**4**); 2-(3-adamantan-1-yl)-1*H*-1,2,4-triazol-5-yl)-4-chloroaniline (**5**); polyoxorin D (**6**), J075-4187 (2-chloro-*N*-((5-(*p*-tolyl)-1,2,4-oxadiazol-3-yl)methyl)nicotin-amide) (**7**).

Table S1. Antifungal activity against *P. infestans*, % (SD: standard deviation)

| Substance<br>(concentration<br>in mg/L) | Diameter of growth zones (mm) and inhibition rate (%) |       |      |       |      |       |       |      |
|-----------------------------------------|-------------------------------------------------------|-------|------|-------|------|-------|-------|------|
|                                         | i                                                     |       | ii   |       | iii  |       | mean  | SD   |
|                                         | (mm)                                                  | (%)   | (mm) | (%)   | (mm) | (%)   | (%)   | (%)  |
| 1d ( <b>25</b> )                        | 19                                                    | 59.26 | 16.0 | 68.24 | 18.0 | 63.53 | 63.67 | 3.67 |
| 1c ( <b>10</b> )                        | 20                                                    | 56.79 | 18.0 | 63.53 | 17.0 | 65.88 | 62.07 | 3.85 |
| 1b ( <b>1</b> )                         | 19                                                    | 59.26 | 19.0 | 61.18 | 19.0 | 61.18 | 60.54 | 0.90 |
| 1a ( <b>0.25</b> )                      | 15                                                    | 69.14 | 15.0 | 70.59 | 16.0 | 68.24 | 69.32 | 0.97 |
| 2 ( <b>50</b> )                         | 28.0                                                  | 37.04 | 30.0 | 35.29 | 28.0 | 40.00 | 37.44 | 1.94 |
| 2 ( <b>50</b> ) + 1d ( <b>25</b> )      | 14.0                                                  | 71.60 | 12.0 | 77.65 | 16.0 | 68.24 | 72.50 | 3.89 |
| 2 ( <b>50</b> ) + 1c ( <b>10</b> )      | 15.0                                                  | 69.14 | 17.0 | 65.88 | 18.0 | 63.53 | 66.18 | 2.30 |
| 2 ( <b>50</b> ) + 1b ( <b>1</b> )       | 19.0                                                  | 59.26 | 14.0 | 72.94 | 16.0 | 68.24 | 66.81 | 5.68 |
| 2 ( <b>50</b> ) + 1a ( <b>0.25</b> )    | 12.0                                                  | 76.54 | 12.0 | 77.65 | 13.0 | 75.29 | 76.49 | 0.96 |
| 3 ( <b>25</b> )                         | 14.0                                                  | 71.60 | 14.0 | 72.94 | 14.0 | 72.94 | 72.50 | 0.63 |
| 3 ( <b>25</b> ) + 1d ( <b>25</b> )      | 15.0                                                  | 69.14 | 16.0 | 68.24 | 17.0 | 65.88 | 67.75 | 1.37 |
| 3 ( <b>25</b> ) + 1c ( <b>10</b> )      | 20.0                                                  | 56.79 | 22.0 | 54.12 | 23.0 | 51.76 | 54.22 | 2.05 |
| 3 ( <b>25</b> ) + 1b ( <b>1</b> )       | 21.0                                                  | 54.32 | 27.0 | 42.35 | 26.0 | 44.71 | 47.13 | 5.18 |
| 3 ( <b>25</b> ) + 1a ( <b>0.25</b> )    | 15.0                                                  | 69.14 | 22.0 | 54.12 | 19.0 | 61.18 | 61.48 | 6.13 |
| 4 ( <b>50</b> )                         | 24.0                                                  | 46.91 | 22.0 | 54.12 | 22.0 | 54.12 | 51.72 | 3.40 |
| 4 ( <b>50</b> ) + 1d ( <b>25</b> )      | 15.0                                                  | 69.14 | 16.0 | 68.24 | 16.0 | 68.24 | 68.54 | 0.42 |
| 4 ( <b>50</b> ) + 1c ( <b>10</b> )      | 14.0                                                  | 71.60 | 14.0 | 72.94 | 14.0 | 72.94 | 72.50 | 0.63 |
| 4 ( <b>50</b> ) + 1b ( <b>1</b> )       | 15.0                                                  | 69.14 | 15.0 | 70.59 | 17.0 | 65.88 | 68.54 | 1.97 |
| 4 ( <b>50</b> ) + 1a ( <b>0.25</b> )    | 20.0                                                  | 56.79 | 20.0 | 58.82 | 18.0 | 63.53 | 59.71 | 2.82 |
| 5 ( <b>25</b> )                         | 22.0                                                  | 51.85 | 20.0 | 58.82 | 24.0 | 49.41 | 53.36 | 3.99 |
| 5 ( <b>25</b> ) + 1d ( <b>25</b> )      | 15.0                                                  | 69.14 | 15.0 | 70.59 | 11.0 | 80.00 | 73.24 | 4.82 |
| 5 ( <b>25</b> ) + 1c ( <b>10</b> )      | 18.0                                                  | 61.73 | 17.0 | 65.88 | 16.0 | 68.24 | 65.28 | 2.69 |
| 5 ( <b>25</b> ) + 1b ( <b>1</b> )       | 20.0                                                  | 56.79 | 19.0 | 61.18 | 16.0 | 68.24 | 62.07 | 4.71 |
| 5 ( <b>25</b> ) + 1a ( <b>0.25</b> )    | 14.0                                                  | 71.60 | 17.0 | 65.88 | 17.0 | 65.88 | 67.79 | 2.70 |
| PDA + 1%DMSO                            | 43                                                    | 0.00  | 45   | 0.00  | 45   | 0.00  | 0.00  | 0.00 |

**Table S2.** Antifungal activity against *F. oxysporum*, % (SD: standard deviation)

| Substance<br>(concentration<br>in mg/L) | Diameter of growth zones (mm) and inhibition rate (%) |       |      |       |      |       |       |      |
|-----------------------------------------|-------------------------------------------------------|-------|------|-------|------|-------|-------|------|
|                                         | i                                                     |       | ii   |       | iii  |       | mean  | SD   |
|                                         | (mm)                                                  | (%)   | (mm) | (%)   | (mm) | (%)   | (%)   | (%)  |
| 1d (25)                                 | 12                                                    | 75.95 | 13   | 73.42 | 12   | 77.65 | 75.67 | 1.74 |
| 1c (10)                                 | 14                                                    | 70.89 | 13   | 73.42 | 14   | 72.94 | 72.41 | 1.10 |
| 1b (1)                                  | 14                                                    | 70.89 | 14   | 70.89 | 16   | 68.24 | 70.00 | 1.25 |
| 1a (0.25)                               | 18                                                    | 60.76 | 19   | 58.23 | 22   | 54.12 | 57.70 | 2.74 |
| 2 (50)                                  | 38.0                                                  | 10.13 | 35.0 | 17.72 | 36.0 | 21.18 | 16.34 | 4.62 |
| 2 (50) + 1d (25)                        | 14.0                                                  | 70.89 | 17.0 | 63.29 | 19.0 | 61.18 | 65.12 | 4.17 |
| 2 (50) + 1c (10)                        | 13.0                                                  | 73.42 | 14.0 | 70.89 | 11.0 | 80.00 | 74.77 | 3.84 |
| 2 (50) + 1b (1)                         | 17.0                                                  | 63.29 | 17.0 | 63.29 | 15.0 | 70.59 | 65.72 | 3.44 |
| 2 (50) + 1a (0.25)                      | 18.0                                                  | 60.76 | 18.0 | 60.76 | 19.0 | 61.18 | 60.90 | 0.20 |
| 3 (25)                                  | 12.0                                                  | 75.95 | 13.0 | 73.42 | 14.0 | 72.94 | 74.10 | 1.32 |
| 3 (25) + 1d (25)                        | 10.0                                                  | 81.01 | 10.0 | 81.01 | 9.0  | 84.71 | 82.24 | 1.74 |
| 3 (25) + 1c (10)                        | 7.0                                                   | 88.61 | 8.0  | 86.08 | 6.0  | 91.76 | 88.82 | 2.33 |
| 3 (25) + 1b (1)                         | 10.0                                                  | 81.01 | 10.0 | 81.01 | 12.0 | 77.65 | 79.89 | 1.59 |
| 3 (25) + 1a (0.25)                      | 12.0                                                  | 75.95 | 12.0 | 75.95 | 10.0 | 82.35 | 78.08 | 3.02 |
| 4 (50)                                  | 27.0                                                  | 37.97 | 27.0 | 37.97 | 26.0 | 44.71 | 40.22 | 3.17 |
| 4 (50) + 1d (25)                        | 11.0                                                  | 78.48 | 12.0 | 75.95 | 12.0 | 77.65 | 77.36 | 1.05 |
| 4 (50) + 1c (10)                        | 13.0                                                  | 73.42 | 13.0 | 73.42 | 13.0 | 75.29 | 74.04 | 0.88 |
| 4 (50) + 1b (1)                         | 17.0                                                  | 63.29 | 18.0 | 60.76 | 15.0 | 70.59 | 64.88 | 4.17 |
| 4 (50) + 1a (0.25)                      | 21.0                                                  | 53.16 | 21.0 | 53.16 | 21.0 | 56.47 | 54.27 | 1.56 |
| 5 (25)                                  | 28.0                                                  | 35.44 | 28.0 | 35.44 | 27.0 | 42.35 | 37.75 | 3.26 |
| 5 (25) + 1d (25)                        | 12.0                                                  | 75.95 | 12.0 | 75.95 | 14.0 | 72.94 | 74.95 | 1.42 |
| 5 (25) + 1c (10)                        | 12.0                                                  | 75.95 | 12.0 | 75.95 | 11.0 | 80.00 | 77.30 | 1.91 |
| 5 (25) + 1b (1)                         | 15.0                                                  | 68.35 | 17.0 | 63.29 | 15.0 | 70.59 | 67.41 | 3.05 |
| 5 (25) + 1a (0.25)                      | 22.0                                                  | 50.63 | 22.0 | 50.63 | 23.0 | 51.76 | 51.01 | 0.53 |
| PDA + 1%DMSO                            | 42                                                    | 0.00  | 42   | 0.00  | 45   | 0.00  | 0.00  | 0.00 |

**Table S3.** Antifungal activity against *C. higginsianum*, % (SD: standard deviation)

| Substance<br>(concentration<br>in mg/L) | Diameter of growth zones (mm) and inhibition rate (%) |        |      |        |      |        |        |      |
|-----------------------------------------|-------------------------------------------------------|--------|------|--------|------|--------|--------|------|
|                                         | i                                                     |        | ii   |        | iii  |        | mean   | SD   |
|                                         | (mm)                                                  | (%)    | (mm) | (%)    | (mm) | (%)    | (%)    | (%)  |
| 1d (25)                                 | 10                                                    | 82.35  | 10   | 83.15  | 9    | 84.71  | 83.40  | 0.98 |
| 1c (10)                                 | 9                                                     | 84.71  | 9    | 85.39  | 9    | 84.71  | 84.94  | 0.32 |
| 1b (1)                                  | 8                                                     | 87.06  | 8    | 87.64  | 9    | 84.71  | 86.47  | 1.27 |
| 1a (0.25)                               | 8                                                     | 87.06  | 8    | 87.64  | 8    | 87.06  | 87.25  | 0.27 |
| 2 (50)                                  | 28                                                    | 40.00  | 30   | 38.20  | 31   | 32.94  | 37.05  | 3.00 |
| 2 (50) + 1d (25)                        | 8                                                     | 87.06  | 8    | 87.64  | 8    | 87.06  | 87.25  | 0.27 |
| 2 (50) + 1c (10)                        | 6                                                     | 91.76  | 6    | 92.13  | 7    | 89.41  | 91.10  | 1.21 |
| 2 (50) + 1b (1)                         | 5                                                     | 94.12  | 6    | 92.13  | 5    | 94.12  | 93.46  | 0.93 |
| 2 (50) + 1a (0.25)                      | 5                                                     | 94.12  | 4    | 96.63  | 5    | 94.12  | 94.95  | 1.18 |
| 3 (25)                                  | 2.5                                                   | 100.00 | 2.5  | 100.00 | 2.5  | 100.00 | 100.00 | 0.00 |
| 3 (25) + 1d (25)                        | 2.5                                                   | 100.00 | 2.5  | 100.00 | 2.5  | 100.00 | 100.00 | 0.00 |
| 3 (25) + 1c (10)                        | 2.5                                                   | 100.00 | 2.5  | 100.00 | 2.5  | 100.00 | 100.00 | 0.00 |
| 3 (25) + 1b (1)                         | 2.5                                                   | 100.00 | 2.5  | 100.00 | 2.5  | 100.00 | 100.00 | 0.00 |
| 3 (25) + 1a (0.25)                      | 2.5                                                   | 100.00 | 2.5  | 100.00 | 2.5  | 100.00 | 100.00 | 0.00 |
| 4 (50)                                  | 21                                                    | 56.47  | 21   | 58.43  | 21   | 56.47  | 57.12  | 0.92 |
| 4 (50) + 1d (25)                        | 8                                                     | 87.06  | 10   | 83.15  | 10   | 82.35  | 84.19  | 2.06 |
| 4 (50) + 1c (10)                        | 8                                                     | 87.06  | 8    | 87.64  | 10   | 82.35  | 85.68  | 2.37 |
| 4 (50) + 1b (1)                         | 10                                                    | 82.35  | 10   | 83.15  | 8    | 87.06  | 84.19  | 2.06 |
| 4 (50) + 1a (0.25)                      | 8                                                     | 87.06  | 8    | 87.64  | 9    | 84.71  | 86.47  | 1.27 |
| 5 (25)                                  | 25                                                    | 47.06  | 25   | 49.44  | 25   | 47.06  | 47.85  | 1.12 |
| 5 (25) + 1d (25)                        | 8                                                     | 87.06  | 8    | 87.64  | 8    | 87.06  | 87.25  | 0.27 |
| 5 (25) + 1c (10)                        | 7                                                     | 89.41  | 7    | 89.89  | 6    | 91.76  | 90.35  | 1.02 |
| 5 (25) + 1b (1)                         | 8                                                     | 87.06  | 6    | 92.13  | 8    | 87.06  | 88.75  | 2.39 |
| 5 (25) + 1a (0.25)                      | 6                                                     | 91.76  | 6    | 92.13  | 6    | 91.76  | 91.89  | 0.17 |
| PDA + 1%DMSO                            | 45                                                    | 0      | 45   | 0.00   | 45   | 0.00   | 0.00   | 0.00 |

**Table S4.** Antifungal activity against *A. niger*, % (SD: standard deviation)

| Substance<br>(concentration<br>in mg/L) | Diameter of growth zones (mm) and inhibition rate (%) |        |      |        |      |        |        |      |
|-----------------------------------------|-------------------------------------------------------|--------|------|--------|------|--------|--------|------|
|                                         | i                                                     |        | ii   |        | iii  |        | mean   | SD   |
|                                         | (mm)                                                  | (%)    | (mm) | (%)    | (mm) | (%)    | (%)    | (%)  |
| 1d (25)                                 | 9                                                     | 84.71  | 9    | 84.71  | 10   | 82.35  | 83.92  | 1.11 |
| 1c (10)                                 | 9                                                     | 84.71  | 9    | 84.71  | 9    | 84.71  | 84.71  | 0.00 |
| 1b (1)                                  | 8                                                     | 87.06  | 8    | 87.06  | 7    | 89.41  | 87.84  | 1.11 |
| 1a (0.25)                               | 9                                                     | 84.71  | 9    | 84.71  | 8    | 87.06  | 85.49  | 1.11 |
| 2 (50)                                  | 40                                                    | 11.76  | 40   | 11.76  | 40   | 11.76  | 11.76  | 0.00 |
| 2 (50) + 1d (25)                        | 8                                                     | 87.06  | 8    | 87.06  | 8    | 87.06  | 87.06  | 0.00 |
| 2 (50) + 1c (10)                        | 6                                                     | 91.76  | 2.5  | 100.00 | 5    | 94.12  | 95.29  | 3.46 |
| 2 (50) + 1b (1)                         | 7                                                     | 89.41  | 6    | 91.76  | 7    | 89.41  | 90.20  | 1.11 |
| 2 (50) + 1a (0.25)                      | 5                                                     | 94.12  | 5    | 94.12  | 6    | 91.76  | 93.33  | 1.11 |
| 3 (25)                                  | 2.5                                                   | 100.00 | 2.5  | 100.00 | 2.5  | 100.00 | 100.00 | 0.00 |
| 3 (25) + 1d (25)                        | 2.5                                                   | 100.00 | 2.5  | 100.00 | 2.5  | 100.00 | 100.00 | 0.00 |
| 3 (25) + 1c (10)                        | 2.5                                                   | 100.00 | 2.5  | 100.00 | 2.5  | 100.00 | 100.00 | 0.00 |
| 3 (25) + 1b (1)                         | 2.5                                                   | 100.00 | 2.5  | 100.00 | 2.5  | 100.00 | 100.00 | 0.00 |
| 3 (25) + 1a (0.25)                      | 2.5                                                   | 100.00 | 2.5  | 100.00 | 2.5  | 100.00 | 100.00 | 0.00 |
| 4 (50)                                  | 36                                                    | 21.18  | 35   | 23.53  | 36   | 21.18  | 21.96  | 1.11 |
| 4 (50) + 1d (25)                        | 7                                                     | 89.41  | 6    | 91.76  | 7    | 89.41  | 90.20  | 1.11 |
| 4 (50) + 1c (10)                        | 5                                                     | 94.12  | 2.5  | 100.00 | 2.5  | 100.00 | 98.04  | 2.77 |
| 4 (50) + 1b (1)                         | 2.5                                                   | 100.00 | 2.5  | 100.00 | 2.5  | 100.00 | 100.00 | 0.00 |
| 4 (50) + 1a (0.25)                      | 9                                                     | 84.71  | 10   | 82.35  | 10   | 82.35  | 83.14  | 1.11 |
| 5 (25)                                  | 28                                                    | 40.00  | 30   | 35.29  | 28   | 40.00  | 38.43  | 2.22 |
| 5 (25) + 1d (25)                        | 6                                                     | 91.76  | 5    | 94.12  | 6    | 91.76  | 92.55  | 1.11 |
| 5 (25) + 1c (10)                        | 3                                                     | 98.82  | 2.5  | 100.00 | 3    | 98.82  | 99.22  | 0.55 |
| 5 (25) + 1b (1)                         | 5                                                     | 94.12  | 3    | 98.82  | 5    | 94.12  | 95.69  | 2.22 |
| 5 (25) + 1a (0.25)                      | 7                                                     | 89.41  | 6    | 91.76  | 4    | 96.47  | 92.55  | 2.93 |
| PDA + 1%DMSO                            | 45                                                    | 0.00   | 45   | 0.00   | 45   | 0.00   | 0.00   | 0.00 |

**Table S5.** Additional inhibition / promotion against *P. infestans*, % (SD: standard deviation)

| Substance<br>(concentration<br>in mg/L) | Towards substance alone |        |        |        |      | Towards tacrolimus |        |        |        |      |
|-----------------------------------------|-------------------------|--------|--------|--------|------|--------------------|--------|--------|--------|------|
|                                         | i                       | ii     | iii    | Mean   | SD   | i                  | ii     | iii    | Mean   | SD   |
| 2 (50) + 1d (25)                        | 34.56                   | 42.36  | 28.24  | 35.05  | 7.07 | 12.34              | 9.41   | 4.71   | 8.82   | 3.85 |
| 2 (50) + 1c (10)                        | 32.10                   | 30.59  | 23.53  | 28.74  | 4.57 | 12.35              | 2.35   | -2.35  | 4.12   | 7.51 |
| 2 (50) + 1b (1)                         | 22.22                   | 37.65  | 28.24  | 29.37  | 7.78 | 0                  | 11.76  | 7.06   | 6.27   | 5.92 |
| 2 (50) + 1a (0.25)                      | 39.50                   | 42.36  | 35.29  | 39.05  | 3.56 | 7.40               | 7.06   | 7.05   | 7.17   | 0.20 |
| 3 (25) + 1d (25)                        | -2.46                   | -4.70  | -7.06  | -4.74  | 2.30 | 9.88               | 0      | 2.35   | 4.08   | 5.16 |
| 3 (25) + 1c (10)                        | -14.81                  | -18.82 | -21.18 | -18.27 | 3.22 | 0                  | -9.41  | -14.12 | -7.84  | 7.19 |
| 3 (25) + 1b (1)                         | -17.28                  | -30.59 | -28.23 | -25.37 | 7.10 | -4.94              | -18.83 | -16.47 | -13.41 | 7.43 |
| 3 (25) + 1a (0.25)                      | -2.46                   | -18.82 | -11.76 | -11.01 | 8.21 | 0                  | -16.47 | -7.06  | -7.84  | 8.26 |
| 4 (50) + 1d (25)                        | 22.23                   | 14.12  | 14.12  | 16.82  | 4.68 | 9.88               | 0      | 4.71   | 4.86   | 4.94 |
| 4 (50) + 1c (10)                        | 24.69                   | 18.82  | 18.82  | 20.78  | 3.39 | 14.81              | 9.41   | 7.06   | 10.43  | 3.97 |
| 4 (50) + 1b (1)                         | 22.23                   | 16.47  | 11.76  | 16.82  | 5.24 | 9.88               | 9.41   | 4.70   | 8.00   | 2.86 |
| 4 (50) + 1a (0.25)                      | 9.88                    | 4.70   | 9.41   | 8.00   | 2.86 | -12.35             | -11.77 | -4.71  | -9.61  | 4.25 |
| 5 (25) + 1d (25)                        | 17.29                   | 11.77  | 30.59  | 19.88  | 9.67 | 9.88               | 2.35   | 16.47  | 9.57   | 7.07 |
| 5 (25) + 1c (10)                        | 9.88                    | 7.06   | 18.83  | 11.92  | 6.15 | 4.94               | 2.35   | 2.36   | 3.22   | 1.49 |
| 5 (25) + 1b (1)                         | 4.94                    | 2.36   | 18.83  | 8.71   | 8.86 | -2.47              | 0      | 7.06   | 1.53   | 4.95 |
| 5 (25) + 1a (0.25)                      | 19.75                   | 7.06   | 16.47  | 14.43  | 6.59 | 2.46               | -4.71  | -2.36  | -1.54  | 3.66 |

**Table S6.** Additional inhibition / promotion against *F. oxysporum*, % (SD: standard deviation)

| Substance<br>(concentration<br>in mg/L) | Towards substance alone |       |       |       |       | Towards tacrolimus |        |        |        |      |
|-----------------------------------------|-------------------------|-------|-------|-------|-------|--------------------|--------|--------|--------|------|
|                                         | i                       | ii    | iii   | Mean  | SD    | i                  | ii     | iii    | Mean   | SD   |
| 2 (50) + 1d (25)                        | 60.76                   | 45.57 | 40.00 | 48.78 | 10.75 | -5.06              | -10.13 | -16.47 | -10.55 | 5.72 |
| 2 (50) + 1c (10)                        | 63.29                   | 53.17 | 58.82 | 58.43 | 5.07  | 2.53               | -2.53  | 7.06   | 2.35   | 4.80 |
| 2 (50) + 1b (1)                         | 53.16                   | 45.57 | 49.41 | 49.38 | 3.80  | -7.60              | -7.60  | 2.35   | -4.28  | 5.74 |
| 2 (50) + 1a (0.25)                      | 50.63                   | 43.04 | 40.00 | 44.56 | 5.47  | 0                  | 2.53   | 7.06   | 3.20   | 3.58 |
| 3 (25) + 1d (25)                        | 5.06                    | 7.59  | 11.77 | 8.14  | 3.39  | 5.06               | 7.59   | 7.06   | 6.57   | 1.33 |
| 3 (25) + 1c (10)                        | 12.66                   | 12.66 | 18.82 | 14.71 | 3.56  | 17.72              | 12.66  | 18.82  | 16.40  | 3.29 |
| 3 (25) + 1b (1)                         | 5.06                    | 7.59  | 4.71  | 5.79  | 1.57  | 10.12              | 10.12  | 9.41   | 9.88   | 0.41 |
| 3 (25) + 1a (0.25)                      | 0                       | 2.53  | 9.41  | 3.98  | 4.87  | 15.19              | 17.72  | 28.23  | 20.38  | 6.91 |
| 4 (50) + 1d (25)                        | 40.51                   | 37.98 | 32.94 | 37.14 | 3.85  | 2.53               | 2.53   | 0      | 1.69   | 1.46 |
| 4 (50) + 1c (10)                        | 35.45                   | 35.45 | 30.58 | 33.83 | 2.81  | 2.53               | 0      | 2.35   | 1.63   | 1.41 |
| 4 (50) + 1b (1)                         | 25.32                   | 22.79 | 25.88 | 24.66 | 1.65  | -7.60              | -10.13 | 2.35   | -5.13  | 6.60 |
| 4 (50) + 1a (0.25)                      | 15.19                   | 15.19 | 11.76 | 14.05 | 1.98  | -7.60              | -5.07  | 2.35   | -3.44  | 5.17 |
| 5 (25) + 1d (25)                        | 40.51                   | 40.51 | 30.59 | 37.20 | 5.73  | 0                  | 2.53   | -4.71  | -0.73  | 3.67 |
| 5 (25) + 1c (10)                        | 40.51                   | 40.51 | 37.65 | 39.56 | 1.65  | 5.06               | 2.53   | 7.06   | 4.88   | 2.27 |
| 5 (25) + 1b (1)                         | 32.91                   | 27.85 | 28.24 | 29.67 | 2.82  | -2.54              | -7.60  | 2.35   | -2.60  | 4.98 |
| 5 (25) + 1a (0.25)                      | 15.19                   | 15.19 | 9.41  | 13.26 | 3.34  | -10.13             | -7.60  | -2.36  | -6.70  | 3.96 |

**Table S7.** Additional inhibition / promotion against *C. higginsianum*, % (SD: standard deviation)

| Substance<br>(concentration<br>in mg/L) | Towards substance alone |       |       |       |      | Towards tacrolimus |       |       |       |      |
|-----------------------------------------|-------------------------|-------|-------|-------|------|--------------------|-------|-------|-------|------|
|                                         | i                       | ii    | iii   | Mean  | SD   | i                  | ii    | iii   | Mean  | SD   |
| 2 (50) + 1d (25)                        | 47.06                   | 49.44 | 54.12 | 50.21 | 3.59 | 4.71               | 4.49  | 2.35  | 3.85  | 1.30 |
| 2 (50) + 1c (10)                        | 51.76                   | 53.93 | 56.47 | 54.05 | 2.36 | 7.05               | 6.74  | 4.70  | 6.16  | 1.28 |
| 2 (50) + 1b (1)                         | 54.12                   | 53.93 | 61.18 | 56.41 | 4.13 | 7.06               | 4.49  | 9.41  | 6.99  | 2.46 |
| 2 (50) + 1a (0.25)                      | 54.12                   | 58.43 | 61.18 | 57.91 | 3.56 | 7.06               | 8.99  | 7.06  | 7.70  | 1.11 |
| 3 (25) + 1d (25)                        | 0                       | 0     | 0     | 0     | 0    | 17.65              | 16.85 | 15.29 | 16.60 | 1.20 |
| 3 (25) + 1c (10)                        | 0                       | 0     | 0     | 0     | 0    | 15.29              | 14.61 | 15.29 | 15.06 | 0.39 |
| 3 (25) + 1b (1)                         | 0                       | 0     | 0     | 0     | 0    | 12.94              | 12.36 | 15.29 | 13.53 | 1.55 |
| 3 (25) + 1a (0.25)                      | 0                       | 0     | 0     | 0     | 0    | 12.94              | 12.36 | 12.94 | 12.75 | 0.33 |
| 4 (50) + 1d (25)                        | 30.59                   | 24.72 | 25.88 | 27.06 | 3.11 | 4.71               | 0     | -2.36 | 0.78  | 3.60 |
| 4 (50) + 1c (10)                        | 30.59                   | 29.21 | 25.88 | 28.56 | 2.42 | 2.35               | 2.25  | -2.36 | 0.75  | 2.69 |
| 4 (50) + 1b (1)                         | 25.88                   | 24.72 | 30.59 | 27.06 | 3.11 | -4.71              | -4.49 | 2.35  | -2.28 | 4.01 |
| 4 (50) + 1a (0.25)                      | 30.59                   | 29.21 | 28.24 | 29.35 | 1.18 | 0                  | 0     | -2.35 | -0.78 | 1.36 |
| 5 (25) + 1d (25)                        | 40.00                   | 38.20 | 40.00 | 39.40 | 1.04 | 4.71               | 4.49  | 2.35  | 3.85  | 1.30 |
| 5 (25) + 1c (10)                        | 42.35                   | 40.45 | 44.70 | 42.50 | 2.13 | 4.70               | 4.50  | 7.05  | 5.42  | 1.42 |
| 5 (25) + 1b (1)                         | 40.00                   | 42.69 | 40.00 | 40.90 | 1.55 | 0                  | 4.49  | 2.35  | 2.28  | 2.25 |
| 5 (25) + 1a (0.25)                      | 44.70                   | 42.69 | 44.70 | 44.03 | 1.16 | 4.70               | 4.49  | 4.70  | 4.63  | 0.12 |

**Table S8.** Additional inhibition / promotion against *A. niger*, % (SD: standard deviation)

| Substance<br>(concentration<br>in mg/L) | Towards substance alone |       |       |       |      | Towards tacrolimus |       |       |       |      |
|-----------------------------------------|-------------------------|-------|-------|-------|------|--------------------|-------|-------|-------|------|
|                                         | i                       | ii    | iii   | Mean  | SD   | i                  | ii    | iii   | Mean  | SD   |
| 2 (50) + 1d (25)                        | 75.30                   | 75.30 | 75.30 | 75.30 | 0.00 | 2.35               | 2.35  | 4.71  | 3.14  | 1.36 |
| 2 (50) + 1c (10)                        | 80.00                   | 88.24 | 82.36 | 83.53 | 4.24 | 7.05               | 15.29 | 9.41  | 10.58 | 4.24 |
| 2 (50) + 1b (1)                         | 77.65                   | 80.00 | 77.65 | 78.43 | 1.36 | 2.35               | 4.70  | 0     | 2.35  | 2.35 |
| 2 (50) + 1a (0.25)                      | 82.36                   | 82.36 | 80.00 | 81.57 | 1.36 | 9.41               | 9.41  | 4.70  | 7.84  | 2.72 |
| 3 (25) + 1d (25)                        | 0                       | 0     | 0     | 0     | 0    | 15.29              | 15.29 | 17.65 | 16.08 | 1.36 |
| 3 (25) + 1c (10)                        | 0                       | 0     | 0     | 0     | 0    | 15.29              | 15.29 | 15.29 | 15.29 | 0.00 |
| 3 (25) + 1b (1)                         | 0                       | 0     | 0     | 0     | 0    | 12.94              | 12.94 | 10.59 | 12.16 | 1.36 |
| 3 (25) + 1a (0.25)                      | 0                       | 0     | 0     | 0     | 0    | 15.29              | 15.29 | 12.94 | 14.51 | 1.36 |
| 4 (50) + 1d (25)                        | 68.23                   | 68.23 | 68.23 | 68.23 | 0.00 | 4.70               | 7.05  | 7.06  | 6.27  | 1.36 |
| 4 (50) + 1c (10)                        | 72.94                   | 76.47 | 78.82 | 76.08 | 2.96 | 9.41               | 15.29 | 15.29 | 13.33 | 3.39 |
| 4 (50) + 1b (1)                         | 78.82                   | 76.47 | 78.82 | 78.04 | 1.36 | 12.94              | 12.94 | 10.59 | 12.16 | 1.36 |
| 4 (50) + 1a (0.25)                      | 63.53                   | 58.82 | 61.17 | 61.17 | 2.36 | 0                  | -2.36 | -4.71 | -2.36 | 2.36 |
| 5 (25) + 1d (25)                        | 51.76                   | 58.83 | 51.76 | 54.12 | 4.08 | 7.05               | 9.41  | 9.41  | 8.62  | 1.36 |
| 5 (25) + 1c (10)                        | 58.82                   | 64.71 | 58.82 | 60.78 | 3.40 | 14.11              | 15.29 | 14.11 | 14.50 | 0.68 |
| 5 (25) + 1b (1)                         | 54.12                   | 63.53 | 54.12 | 57.26 | 5.43 | 7.06               | 11.76 | 4.71  | 7.84  | 3.59 |
| 5 (25) + 1a (0.25)                      | 49.41                   | 56.47 | 56.47 | 54.12 | 4.08 | 4.70               | 7.05  | 9.41  | 7.05  | 2.36 |



**Table S9.** Spearman's correlations of substances' 1-5 physico-chemical data *versus* their average individual antifungal activities

| Average activity, %                | Spearman's rho towards  | MW   | HA   | AHA  | sp3  | RB   | HBA  | HBD  | MR   | TPSA | ESOL  | Consensus |
|------------------------------------|-------------------------|------|------|------|------|------|------|------|------|------|-------|-----------|
| <i>Aspergillus niger</i>           | Correlation Coefficient | .700 | .700 | .112 | .700 | .872 | .783 | .158 | .700 | .359 | -.700 | .600      |
|                                    | Sig. (2-tailed)         | .188 | .188 | .858 | .188 | .054 | .118 | .800 | .188 | .553 | .188  | .285      |
|                                    | N                       | 5    | 5    | 5    | 5    | 5    | 5    | 5    | 5    | 5    | 5     | 5         |
| <i>Colletotrichum higginsianum</i> | Correlation Coefficient | .500 | .500 | .112 | .500 | .872 | .783 | .158 | .500 | .359 | -.500 | .300      |
|                                    | Sig. (2-tailed)         | .391 | .391 | .858 | .391 | .054 | .118 | .800 | .391 | .553 | .391  | .624      |
|                                    | N                       | 5    | 5    | 5    | 5    | 5    | 5    | 5    | 5    | 5    | 5     | 5         |
| <i>Phytophthora infestans</i>      | Correlation Coefficient | .700 | .700 | .112 | .700 | .872 | .783 | .158 | .700 | .359 | -.700 | .600      |
|                                    | Sig. (2-tailed)         | .188 | .188 | .858 | .188 | .054 | .118 | .800 | .188 | .553 | .188  | .285      |
|                                    | N                       | 5    | 5    | 5    | 5    | 5    | 5    | 5    | 5    | 5    | 5     | 5         |
| <i>Fusarium oxysporum</i>          | Correlation Coefficient | .500 | .500 | .112 | .500 | .872 | .783 | .158 | .500 | .359 | -.500 | .300      |
|                                    | Sig. (2-tailed)         | .391 | .391 | .858 | .391 | .054 | .118 | .800 | .391 | .553 | .391  | .624      |
|                                    | N                       | 5    | 5    | 5    | 5    | 5    | 5    | 5    | 5    | 5    | 5     | 5         |

MW - molecular weight, g/mol; HA - number of heavy atoms; AHA - number of aromatic heavy atoms; sp3 - fraction Csp3; RB - number of rotatable bonds; HBA - number of H-bond acceptors; HBD - number of H-bond donors; MR - molar refractivity; TPSA - topological polar surface area, Å². ESOL - water solubility coefficient. Consensus – lipophilicity coefficient.

**Table S10.** Descriptives of formed bonds to chitin deacetylase of *A. niger* (PDB ID: 7BLY) in order of decreasing affinity

| # | Bond from - to                | Dist., Å | Category      | Type             |
|---|-------------------------------|----------|---------------|------------------|
| 5 | :UNL1:H - A:ASP47:OD2         | 2.98162  | HB            | Conventional HB  |
|   | :UNL1:H - A:ASP48:OD1         | 2.63156  | HB            | Conventional HB  |
|   | :UNL1:H - A:HIS97:NE2         | 2.82630  | HB            | Conventional HB  |
|   | :UNL1:H - A:HIS195:NE2        | 3.06087  | HB            | Conventional HB  |
|   | :UNL1:H - A:HIS101:NE2        | 2.87160  | HB            | Conventional HB  |
|   | :UNL1:H - A:ASP48:OD2         | 2.49472  | HB            | Conventional HB  |
|   | A:HIS101 - :UNL1              | 5.18357  | Hydrophobic   | Pi-Pi T-shaped   |
|   | A:PHE139 - :UNL1              | 5.08185  | Hydrophobic   | Pi-Pi T-shaped   |
|   | A:TYR138:C,O;PHE139:N - :UNL1 | 4.57714  | Hydrophobic   | Amide-Pi Stacked |
|   | A:TYR166 - :UNL1              | 4.36084  | Hydrophobic   | Pi-Alkyl         |
|   | :UNL1 - A:LEU193              | 5.05138  | Hydrophobic   | Pi-Alkyl         |
| 7 | A:ASP162:OD2 - :UNL1          | 4.77741  | Electrostatic | Pi-Anion         |
|   | A:TYR138 - :UNL1              | 5.16376  | Hydrophobic   | Pi-Pi T-shaped   |
|   | A:PHE139 - :UNL1              | 4.92188  | Hydrophobic   | Pi-Pi T-shaped   |
|   | A:HIS195 - :UNL1              | 4.30177  | Hydrophobic   | Pi-Pi T-shaped   |
|   | :UNL1 - A:TYR138              | 5.03862  | Hydrophobic   | Pi-Pi T-shaped   |
|   | A:TYR138:C,O;PHE139:N - :UNL1 | 4.06381  | Hydrophobic   | Amide-Pi Stacked |
|   | A:TYR138 - :UNL1:CL           | 5.19386  | Hydrophobic   | Pi-Alkyl         |
|   | A:PHE139 - :UNL1:C            | 4.63293  | Hydrophobic   | Pi-Alkyl         |
| 4 | :UNL1:H - A:ASP47:OD2         | 2.70330  | HB            | Conventional HB  |
|   | :UNL1:H - A:ASP48:OD1         | 2.80487  | HB            | Conventional HB  |
|   | :UNL1:H - A:HIS195:NE2        | 2.83636  | HB            | Conventional HB  |
|   | :UNL1:H - A:ASP48:OD1         | 2.78882  | HB            | Conventional HB  |
|   | :UNL1:H - A:HIS101:NE2        | 2.85082  | HB            | Conventional HB  |
|   | :UNL1:H - A:ASP48:OD2         | 2.54247  | HB            | Conventional HB  |
|   | :UNL1:H - A:HIS101:NE2        | 3.05610  | HB            | Conventional HB  |
|   | A:LEU193:CD2 - :UNL1          | 3.93587  | Hydrophobic   | Pi-Sigma         |
|   | A:TYR138 - :UNL1              | 5.76257  | Hydrophobic   | Pi-Pi T-shaped   |
|   | A:PHE139 - :UNL1              | 4.88005  | Hydrophobic   | Pi-Pi T-shaped   |
|   | :UNL1 - A:TYR138              | 4.93936  | Hydrophobic   | Pi-Pi T-shaped   |
|   | A:TYR138:C,O;PHE139:N - :UNL1 | 4.50182  | Hydrophobic   | Amide-Pi Stacked |
|   | A:TYR166 - :UNL1              | 4.56746  | Hydrophobic   | Pi-Alkyl         |
| 3 | :UNL1:C - A:HIS101:NE2        | 3.60228  | HB            | Carbon HB        |
|   | A:TYR166 - :UNL1              | 3.67595  | Hydrophobic   | Pi-Pi Stacked    |
|   | A:TYR138 - :UNL1              | 5.85059  | Hydrophobic   | Pi-Pi T-shaped   |
|   | A:HIS195 - :UNL1              | 5.25469  | Hydrophobic   | Pi-Pi T-shaped   |
|   | :UNL1 - A:PHE139              | 5.12894  | Hydrophobic   | Pi-Pi T-shaped   |
|   | :UNL1 - A:LEU193              | 5.16708  | Hydrophobic   | Pi-Alkyl         |
| 6 | A:LYS164:NZ - A:UNK1:O        | 3.21216  | HB            | Conventional HB  |
|   | A:UNK1:H - A:ASP162:OD2       | 2.23064  | HB            | Conventional HB  |
|   | A:UNK1:H - A:HIS195:NE2       | 2.88467  | HB            | Conventional HB  |
|   | A:UNK1:H - A:ASP48:OD2        | 2.67908  | HB            | Conventional HB  |
|   | A:UNK2:H - A:TYR166           | 3.28050  | HB            | Pi-Donor HB      |
|   | A:TYR166 - A:UNK2:C           | 5.07634  | Hydrophobic   | Pi-Alkyl         |
| 1 | A:TYR138 - :UNL1:C            | 5.15402  | Hydrophobic   | Pi-Alkyl         |
|   | A:TYR138 - :UNL1:C            | 4.46736  | Hydrophobic   | Pi-Alkyl         |
|   | A:TYR166 - :UNL1              | 3.87159  | Hydrophobic   | Pi-Alkyl         |
| 2 | :UNL1:H - A:ASP47:OD2         | 2.46783  | HB            | Conventional HB  |
|   | :UNL1:C - A:PHE139            | 3.59347  | Hydrophobic   | Pi-Sigma         |
|   | :UNL1:C - A:LEU193            | 4.98336  | Hydrophobic   | Alkyl            |

**Table S11.** Descriptives of formed bonds to chitin deacetylase of *A. nidulans*  
(PDB ID: 2Y8U) in order of decreasing affinity

| # | Bond from - to                | Dist., Å | Category    | Type             |
|---|-------------------------------|----------|-------------|------------------|
| 5 | :UNL1:H - B:ASP47:OD2         | 2.80089  | HB          | Conventional HB  |
|   | :UNL1:H - B:ASP48:OD1         | 2.72298  | HB          | Conventional HB  |
|   | :UNL1:H - B:HIS97:NE2         | 2.57584  | HB          | Conventional HB  |
|   | :UNL1:H - B:ASP48:OD2         | 2.85985  | HB          | Conventional HB  |
|   | :UNL1:H - B:ASP48:OD2         | 2.22686  | HB          | Conventional HB  |
|   | :UNL1 - B:TYR166              | 4.91399  | Hydrophobic | Pi-Pi Stacked    |
|   | B:HIS101 - :UNL1              | 4.96149  | Hydrophobic | Pi-Pi T-shaped   |
|   | A:TYR138 - :UNL1:C            | 4.96885  | Hydrophobic | Pi-Alkyl         |
|   | A:TYR166 - :UNL1              | 4.84305  | Hydrophobic | Pi-Alkyl         |
|   | B:TYR166 - :UNL1:C            | 4.82433  | Hydrophobic | Pi-Alkyl         |
|   | :UNL1 - B:LEU139              | 5.21146  | Hydrophobic | Pi-Alkyl         |
|   | :UNL1 - B:LEU194              | 5.25501  | Hydrophobic | Pi-Alkyl         |
| 7 | A:TYR166:OH - :UNL1:O         | 3.11380  | HB          | Conventional HB  |
|   | B:TYR166:OH - :UNL1:N         | 2.83306  | HB          | Conventional HB  |
|   | B:HIS196:CE1 - :UNL1:O        | 3.71522  | HB          | Carbon HB        |
|   | :UNL1:C - B:ASP48:OD2         | 3.69202  | HB          | Carbon HB        |
|   | A:TYR166:OH - :UNL1           | 4.07738  | HB          | Pi-Donor HB      |
|   | A:TYR166 - :UNL1              | 4.11548  | Hydrophobic | Pi-Pi Stacked    |
|   | B:TYR166 - :UNL1              | 5.03911  | Hydrophobic | Pi-Pi T-shaped   |
|   | B:HIS196 - :UNL1              | 4.31393  | Hydrophobic | Pi-Pi T-shaped   |
|   | :UNL1 - B:TYR138              | 5.12809  | Hydrophobic | Pi-Pi T-shaped   |
|   | :UNL1:CL - B:LEU139           | 4.22426  | Hydrophobic | Alkyl            |
|   | :UNL1:CL - B:LEU194           | 4.68699  | Hydrophobic | Alkyl            |
|   | A:HIS101 - :UNL1:C            | 5.36555  | Hydrophobic | Pi-Alkyl         |
|   | A:TYR138 - :UNL1:C            | 4.97760  | Hydrophobic | Pi-Alkyl         |
| 4 | :UNL1:H - B:ASP47:OD2         | 2.98211  | HB          | Conventional HB  |
|   | :UNL1:H - B:ASP48:OD1         | 2.78720  | HB          | Conventional HB  |
|   | :UNL1:H - B:HIS97:NE2         | 2.11523  | HB          | Conventional HB  |
|   | :UNL1:H - B:HIS101:NE2        | 3.06540  | HB          | Conventional HB  |
|   | :UNL1:H - B:ASP48:OD2         | 2.35145  | HB          | Conventional HB  |
|   | :UNL1 - B:TYR166              | 4.99064  | Hydrophobic | Pi-Pi Stacked    |
|   | :UNL1 - B:TYR138              | 5.01241  | Hydrophobic | Pi-Pi T-shaped   |
|   | A:TYR166 - :UNL1              | 5.42975  | Hydrophobic | Pi-Alkyl         |
|   | B:TYR166 - :UNL1              | 4.73867  | Hydrophobic | Pi-Alkyl         |
|   | :UNL1 - B:LEU139              | 5.02651  | Hydrophobic | Pi-Alkyl         |
| 3 | :UNL1:H - B:HIS196:NE2        | 2.58544  | HB          | Conventional HB  |
|   | :UNL1:C - B:HIS101:NE2        | 3.56747  | HB          | Carbon HB        |
|   | B:TYR166 - :UNL1              | 3.79118  | Hydrophobic | Pi-Pi Stacked    |
|   | B:TYR138 - :UNL1              | 5.45556  | Hydrophobic | Pi-Pi T-shaped   |
|   | B:HIS196 - :UNL1              | 5.45597  | Hydrophobic | Pi-Pi T-shaped   |
|   | B:TYR138:C,O;LEU139:N - :UNL1 | 4.47648  | Hydrophobic | Amide-Pi Stacked |
|   | B:TYR138 - :UNL1              | 5.37462  | Hydrophobic | Pi-Alkyl         |
|   | :UNL1 - B:LEU139              | 4.88582  | Hydrophobic | Pi-Alkyl         |
|   | :UNL1 - B:LEU194              | 5.17241  | Hydrophobic | Pi-Alkyl         |
| 6 | A:GLN169:NE2 - A:UNK2:O       | 2.85033  | HB          | Conventional HB  |
|   | A:TYR200:N - A:UNK2:O         | 3.37169  | HB          | Conventional HB  |
|   | A:TYR200:N - A:UNK2:O         | 3.05134  | HB          | Conventional HB  |
|   | B:ASP75:N - A:UNK2:O          | 3.05606  | HB          | Conventional HB  |
|   | B:HIS101:ND1 - A:UNK1:O       | 2.91237  | HB          | Conventional HB  |
|   | B:TYR138:OH - A:UNK1:O        | 2.97936  | HB          | Conventional HB  |
|   | A:UNK2:H - B:TYR99:O          | 2.83443  | HB          | Conventional HB  |
|   | A:UNK1:H - B:ASP48:OD2        | 2.16910  | HB          | Conventional HB  |
|   | A:UNK1:H - A:TYR166:O         | 2.80140  | HB          | Conventional HB  |
|   | A:UNK1:H - B:TYR138:OH        | 2.12115  | HB          | Conventional HB  |
|   | A:UNK1:H - B:ASP100:O         | 2.72129  | HB          | Conventional HB  |
|   | A:TRP201:CD1 - A:UNK2:O       | 3.50056  | HB          | Carbon HB        |
|   | A:UNK2:C - A:UNK1:O           | 3.26472  | HB          | Carbon HB        |
|   | A:UNK2:C - B:ASP100:OD1       | 3.67098  | HB          | Carbon HB        |
|   | A:UNK1:H - B:HIS101           | 2.40928  | HB          | Pi-Donor HB      |
|   | A:UNK2 - B:LEU73              | 5.46725  | Hydrophobic | Pi-Alkyl         |
| 1 | :UNL1:H - B:ASP100:O          | 2.22614  | HB          | Conventional HB  |
|   | A:HIS199:CE1 - :UNL1:O        | 2.98483  | HB          | Carbon HB        |
|   | :UNL1:C - :UNL1:O             | 3.16631  | HB          | Carbon HB        |
|   | :UNL1:C - B:HIS101            | 3.62918  | Hydrophobic | Pi-Sigma         |
|   | :UNL1 - A:ILE198              | 5.16828  | Hydrophobic | Alkyl            |
|   | :UNL1:C - A:ILE198            | 4.57220  | Hydrophobic | Alkyl            |
|   | A:HIS101 - :UNL1:C            | 4.25195  | Hydrophobic | Pi-Alkyl         |
|   | A:TYR138 - :UNL1:C            | 4.78218  | Hydrophobic | Pi-Alkyl         |
|   | A:TYR138 - :UNL1:C            | 5.03270  | Hydrophobic | Pi-Alkyl         |
|   | A:TYR166 - :UNL1:C            | 4.85782  | Hydrophobic | Pi-Alkyl         |
|   | A:TYR166 - :UNL1:C            | 5.11688  | Hydrophobic | Pi-Alkyl         |
|   | A:HIS199 - :UNL1:C            | 4.22824  | Hydrophobic | Pi-Alkyl         |
|   | A:HIS199 - :UNL1              | 5.16460  | Hydrophobic | Pi-Alkyl         |
|   | B:TYR166 - :UNL1:C            | 4.63109  | Hydrophobic | Pi-Alkyl         |
|   | B:TYR166 - :UNL1:C            | 5.33172  | Hydrophobic | Pi-Alkyl         |
|   | B:HIS199 - :UNL1:C            | 4.57750  | Hydrophobic | Pi-Alkyl         |

|   |                        |         |             |                 |
|---|------------------------|---------|-------------|-----------------|
| 2 | B:TYR138:N - :UNL1:O   | 3.12194 | HB          | Conventional HB |
|   | :UNL1:H - B:ASP48:OD1  | 2.45275 | HB          | Conventional HB |
|   | :UNL1:H - B:HIS101:NE2 | 2.24623 | HB          | Conventional HB |
|   | :UNL1:C - B:TYR166     | 3.74718 | Hydrophobic | Pi-Sigma        |
|   | B:TYR138 - :UNL1:C     | 5.41309 | Hydrophobic | Pi-Alkyl        |
|   | B:HIS196 - :UNL1:C     | 4.99139 | Hydrophobic | Pi-Alkyl        |
